# Supplementary material for: Tempeh fermentation improves the nutritional and functional characteristics of Jack beans (Canavalia ensiformis (L.) DC)
Source: Royal Society of Chemistry journal article supplement (doi:10.1039/d3fo05379b), 2024-01-01
Supplement: d3fo05379b1.pdf [file d3fo05379b1.pdf]

## Supporting information

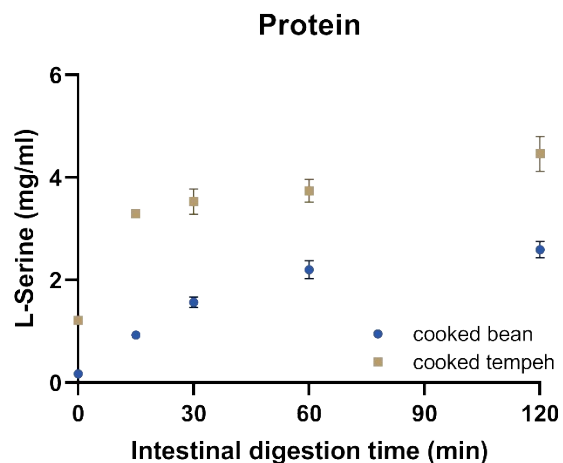

Fig. S1. Concentration of L-serine equivalents (a measure of protein hydrolysis) in the supernatant during in vitro digestion of cooked Jack bean and Jack bean tempeh (N=3, Mean with error bars that indicate standard deviations).

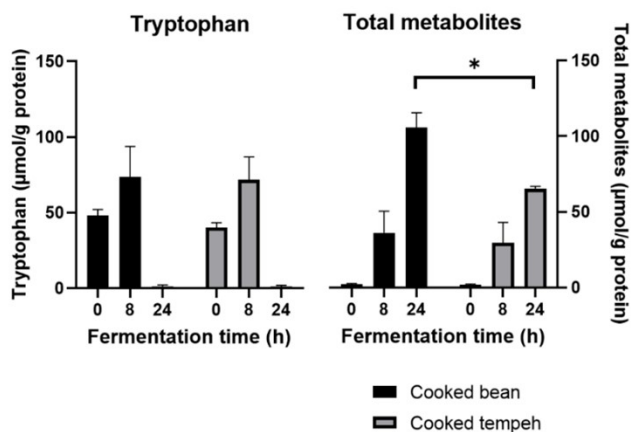

Fig. S2. Tryptophan and total Tryptophan metabolites produced per g protein of cooked bean and cooked tempeh during in vitro colonic fermentation. An asterisk symbol indicates a significant difference ( $p < 0.05$ ). (N=3, Mean with error bars that indicate standard error of the mean)

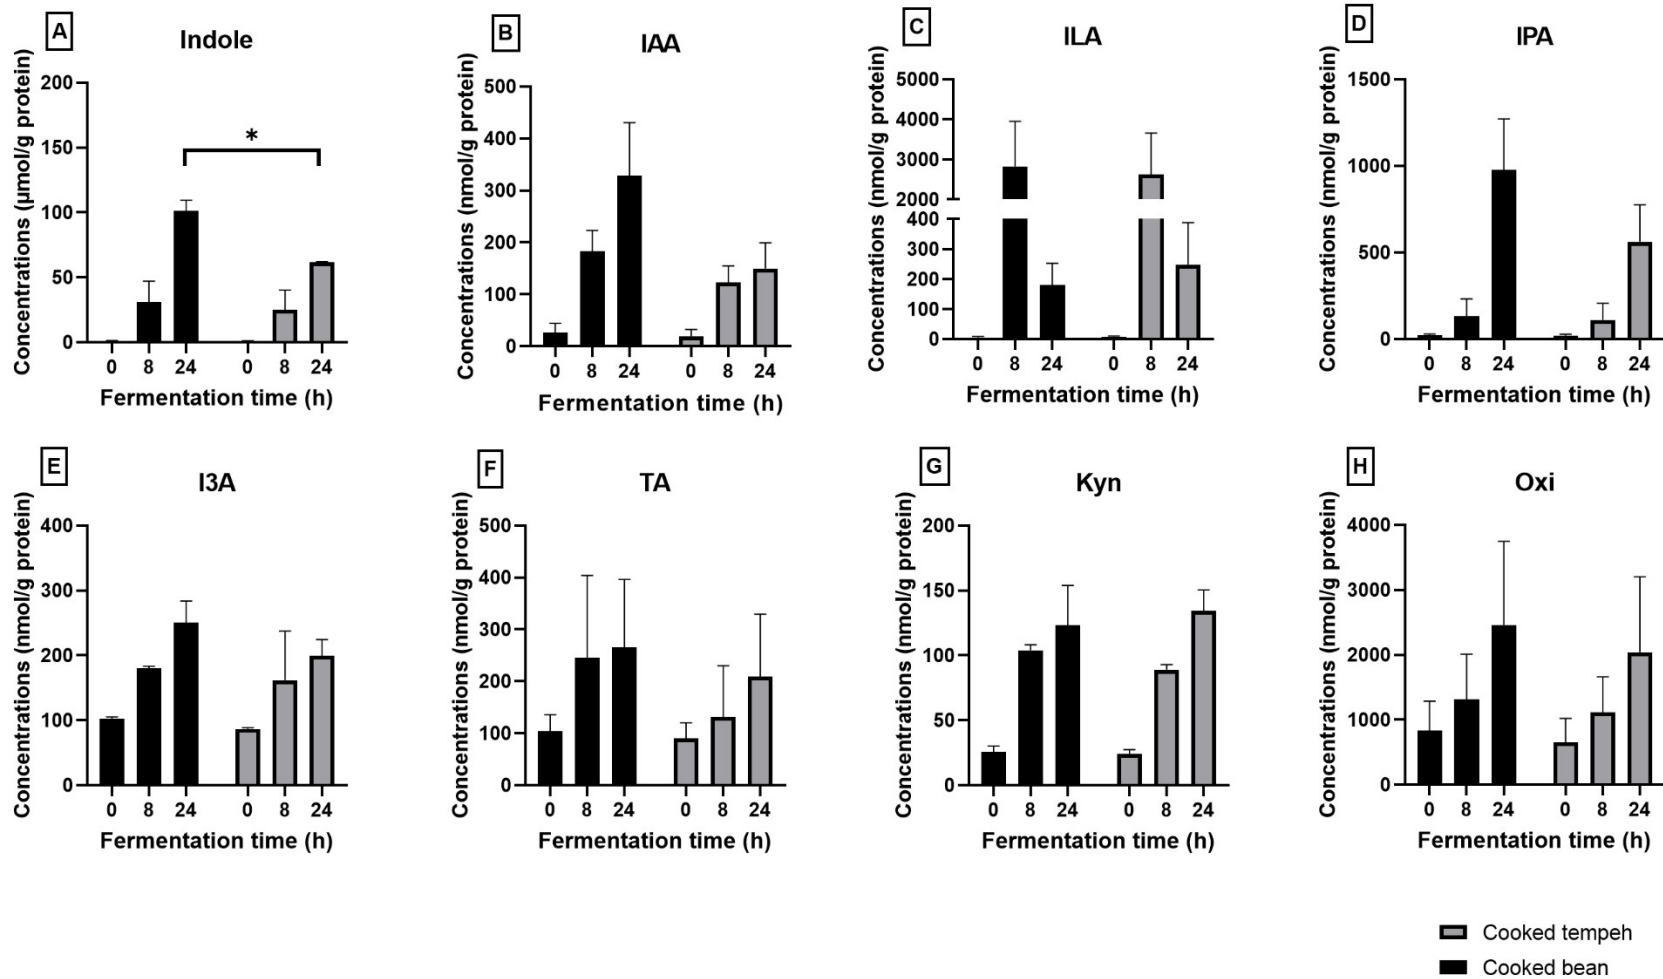

Fig. S3. Tryptophan metabolites produced per g protein of cooked bean and cooked tempeh during in vitro colonic fermentation of cooked jack beans and cooked Jack bean tempeh. An asterisk symbol indicates a significant difference. (N=3, Mean with error bars that indicate standard error of the mean) IAA: Indole-3-acetic acid, ILA: Indole-3-lactic acid, IPA: 3-indolepropionic acid, I3A: Indole-3-aldehyde, TA: tryptamine, Kyn: Kynurenine, Oxi: Oxindole.

Table S1. Starch digestibility of cooked bean and cooked tempeh as expressed as g digested starch/100 g starch (N=3, Mean  $\pm$  standard deviations)

| Intestinal phase (min) | g digested starch/100 g starch |                 |
|------------------------|--------------------------------|-----------------|
|                        | Cooked bean                    | Cooked tempeh   |
| 0                      | 0.0 $\pm$ 0.1                  | 0.9 $\pm$ 0.1*  |
| 15                     | 32.2 $\pm$ 1.0                 | 32.7 $\pm$ 2.0  |
| 30                     | 35.4 $\pm$ 1.5                 | 33.3 $\pm$ 1.7  |
| 60                     | 46.2 $\pm$ 3.0                 | 35.1 $\pm$ 2.0* |
| 120                    | 48.9 $\pm$ 1.7                 | 35.8 $\pm$ 2.0* |

Asterisk symbol indicates a significant difference between cooked bean and cooked tempeh.

Table S2. SCFAs produced by cooked bean and cooked tempeh during colonic fermentation after normalization with blank samples (N=3, Mean  $\pm$  standard error of the mean)

| SCFAs       | Time (h) | Cooked bean (mmol/g DM) | Cooked tempeh (mmol/g DM) |
|-------------|----------|-------------------------|---------------------------|
| Acetate     | 8        | 0.328 $\pm$ 0.020       | 0.347 $\pm$ 0.088         |
|             | 24       | 0.490 $\pm$ 0.175       | 0.463 $\pm$ 0.090         |
| Propionate  | 8        | 0.148 $\pm$ 0.028       | 0.211 $\pm$ 0.023         |
|             | 24       | 0.216 $\pm$ 0.037       | 0.342 $\pm$ 0.052*        |
| Butyrate    | 8        | -0.005 $\pm$ 0.004      | -0.013 $\pm$ 0.028        |
|             | 24       | 0.041 $\pm$ 0.051       | -0.006 $\pm$ 0.039        |
| Valerate    | 8        | -0.019 $\pm$ 0.010      | -0.021 $\pm$ 0.020        |
|             | 24       | -0.024 $\pm$ 0.021      | -0.046 $\pm$ 0.030        |
| Isobutyrate | 8        | 0.000 $\pm$ 0.000       | 0.000 $\pm$ 0.001         |
|             | 24       | -0.037 $\pm$ 0.013      | -0.039 $\pm$ 0.015        |
| Isovalerate | 8        | 0.000 $\pm$ 0.001       | -0.001 $\pm$ 0.003        |
|             | 24       | -0.034 $\pm$ 0.006      | -0.039 $\pm$ 0.013        |
| Total SCFAs | 8        | 0.451 $\pm$ 0.049       | 0.524 $\pm$ 0.119         |
|             | 24       | 0.650 $\pm$ 0.251       | 0.676 $\pm$ 0.153         |

Asterisk symbol indicates a significant difference between cooked bean and cooked tempeh.

Table S3. Tryptophan, glutamate, and GABA content in dry bean flour (N=3, Mean  $\pm$  standard deviations)

| Amino acids | Cooked bean (mg/g dry flour) | Cooked tempeh (mg/g dry flour) |
|-------------|------------------------------|--------------------------------|
| Tryptophan  | 0.02 $\pm$ 0.00              | 8.12 $\pm$ 0.09                |
| Glutamate   | 0.92 $\pm$ 0.03              | 18.56 $\pm$ 0.20               |
| GABA        | 1.10 $\pm$ 0.06              | 8.06 $\pm$ 0.02                |

Table S4. %abundance of Tryptophan metabolites

| Trp<br>metabolites | %abundance |      |
|--------------------|------------|------|
|                    | CB         | CT   |
| Indole             | 95.7       | 94.6 |
| IAA                | 0.3        | 0.2  |
| ILA                | 0.2        | 0.4  |
| IPA                | 0.9        | 0.9  |
| I3A                | 0.2        | 0.3  |
| TA                 | 0.3        | 0.3  |
| Kyn                | 0.1        | 0.2  |
| Oxi                | 2.3        | 3.1  |
